# Supplementary material
Source: PubMed Central journal article supplement (PMC4790010)
Supplement: ortm856005.ww1_default.pdf [file ortm856005.ww1_default.pdf]

## **Appendix 1. Countries in the Epidemiological Subregions**

### **African Region (AfrE)**

Botswana, Burundi, Central African Republic, Congo, Côte d'Ivoire, Democratic Republic of the Congo, Eritrea, Ethiopia, Kenya, Lesotho, Malawi, Mozambique, Namibia, Rwanda, South Africa, Swaziland, Uganda, United Republic of Tanzania, Zambia, Zimbabwe

### **South East Asia Region (SearD)**

Bangladesh, Bhutan, Democratic People's Republic of Korea, India, Maldives, Myanmar, Nepal

## Appendix 2. Summary of intervention effectiveness for tobacco control strategies

| MPOWER component                            | Interventions assessed                                            | Code                    | Efficacy <sup>a</sup><br>(reduced smoking) | References | Coverage <sup>b</sup>         | Adherence            | Population-level effect <sup>c</sup><br>(smoking prevalence) |                         |
|---------------------------------------------|-------------------------------------------------------------------|-------------------------|--------------------------------------------|------------|-------------------------------|----------------------|--------------------------------------------------------------|-------------------------|
|                                             |                                                                   |                         |                                            |            |                               |                      | <i>Afr-E</i>                                                 | <i>SearD</i>            |
| <b>M</b> onitor tobacco use / policies      | None                                                              |                         |                                            |            |                               |                      |                                                              |                         |
| <b>P</b> rotect people from tobacco smoke   | Clean indoor air laws                                             | TOB-4                   | -29%<br>(where enforced)                   | 1          | 35%<br>(indoor public places) | 50%                  | -0.3%                                                        | -0.8%                   |
| <b>O</b> ffer to help quit tobacco use      | Nicotine replacement therapy;<br>Brief advice; Counselling        | TOB-6<br>TOB-7<br>TOB-8 | -6.1%<br>-6.8%<br>-9.4%                    | 2-4        | 20%                           | 80%                  | -1.0%<br>-1.1%<br>-1.5%                                      | -1.0%<br>-1.1%<br>-1.5% |
| <b>W</b> arn about the dangers of tobacco   | Counter-advertising and warning labels                            | TOB-5                   | -5%                                        | 5          | 100%                          | 80%                  | -4%                                                          | -4%                     |
| <b>E</b> nforce bans on tobacco advertising | Comprehensive ban on advertising of tobacco products              | TOB-3                   | -5%                                        | 5          | 100%                          | 50%                  | -2.5%                                                        | -2.5%                   |
| <b>R</b> aise taxes on tobacco              | Current excise taxation (~40%)<br>Increased excise taxation (60%) | TOB-1<br>TOB-2          | -0.7<br>(price elasticity)                 | 6          | 100%                          | 85%<br>(15% untaxed) | -29.3%<br>-54.6%                                             | -31.4%<br>-58.9%        |

### References:

1. Fichtenberg CM, Glantz SA (2002) Effect of smoke-free workplaces on smoking behaviour: systematic review. *BMJ*, 325: 188
2. Oster et al, 1986: Effectiveness of Nicotine Gum as Adjunct to Physician's Advice Against Cigarette Smoking
3. Jha and Chaloupka, 2000 Effect of cessation interventions
4. Shearer and Shanahan, Cost Effectiveness Analysis of Smoking Cessation Interventions, *Australian and New Zealand Journal of Public Health*, 30 (5), 2006.
5. Saffer and Chaloupka - 2000
6. WHO (2010). WHO Technical manual on tobacco tax administration. WHO; Geneva, Switzerland.

### Appendix 3. Summary of intervention effectiveness for CVD intervention strategies

| Code                                     | Intervention                                                                                                                | Target population                          | Outcome                                                                    | Risk reduction            | Reference(s) |
|------------------------------------------|-----------------------------------------------------------------------------------------------------------------------------|--------------------------------------------|----------------------------------------------------------------------------|---------------------------|--------------|
| <b>Primary prevention</b>                |                                                                                                                             |                                            |                                                                            |                           |              |
| <b>Non-personal</b>                      |                                                                                                                             |                                            |                                                                            |                           |              |
| CVD-1                                    | Voluntary salt reduction by manufacturers of processed foods, plus appropriate labelling                                    | Population wide                            | Total dietary salt intake                                                  | 15%                       | 1-3          |
| CVD-2                                    | Legislation to decrease salt content of processed foods, plus appropriate labelling and enforcement                         | Population wide                            | Total dietary salt intake                                                  | 30%                       | 1-3          |
| CVD-3                                    | Health education through mass media                                                                                         | Population wide                            | Total cholesterol (TCh)                                                    | 2%                        | 4            |
| <b>Personal</b>                          |                                                                                                                             |                                            |                                                                            |                           |              |
| CVD-4                                    | Blood pressure lowering medication (beta-blocker and diuretic) and education                                                | SBP $\geq$ 160mmHg OR $\geq$ 140mmHg       | Difference between actual SBP and 115 mmHg                                 | -33%                      | 5-9          |
| CVD-5                                    | Cholesterol lowering medication (statin) and education                                                                      | Tch $\geq$ 6.2 mmol/l OR $\geq$ 5.7 mmol/l | Total blood cholesterol                                                    | -20%                      | 10           |
| CVD-6                                    | Cholesterol lowering medication (statin) and education                                                                      |                                            |                                                                            |                           |              |
| CVD-7                                    | Cholesterol lowering medication (statin) and education                                                                      |                                            |                                                                            |                           |              |
| CVD-8 to CVD-11                          | Combined drug therapy (aspirin, beta blocker, statin and diuretic) for individuals at a given cardiovascular risk threshold | Absolute risk $\geq$ 35%, 25%, 15%, 5%     | Absolute risk of CVD                                                       | -33% (SBP)<br>- 20% (TCh) | 5-11         |
| <b>Acute-care</b>                        |                                                                                                                             |                                            |                                                                            |                           |              |
| <b>Acute myocardial infarction (AMI)</b> |                                                                                                                             |                                            |                                                                            |                           |              |
| CVD-14                                   | Aspirin                                                                                                                     |                                            |                                                                            | -24%                      | 11           |
| CVD-16                                   | ACE inhibitors                                                                                                              |                                            |                                                                            | -7%                       | 12           |
| CVD-18                                   | $\beta$ -Blockers                                                                                                           |                                            |                                                                            | -4%                       | 16           |
| CVD-21                                   | Thrombolysis with streptokinase                                                                                             |                                            |                                                                            | -26%                      | 13-14        |
| CVD-22                                   | Primary PTCA                                                                                                                | Hospitalized patients with AMI             | 28-day AMI case-fatality rate (In-hospital & post-in-hospital)             | -61%                      | 13-15        |
| <b>Stroke</b>                            |                                                                                                                             |                                            |                                                                            |                           |              |
| CVD-28                                   | Organised stroke unit care                                                                                                  | Hospitalized patients with stroke          | 28-day Stroke case-fatality rate (In-hospital & post-in-hospital)          | -14%                      | 17           |
| <b>Ischemic stroke</b>                   |                                                                                                                             |                                            |                                                                            |                           |              |
| CVD-24                                   | Aspirin                                                                                                                     | Hospitalized patients with ischemic stroke | 28-day Ischemic Stroke case-fatality rate (In-hospital & post-in-hospital) | -5%                       | 11           |

## Secondary and tertiary prevention

### *Post-myocardial infarction*

|        |                        |                             |                                   |      |    |
|--------|------------------------|-----------------------------|-----------------------------------|------|----|
| CVD-15 | Aspirin                |                             |                                   | -15% | 11 |
| CVD-17 | ACE inhibitors         |                             |                                   | -21% | 18 |
| CVD-19 | β-Blockers             |                             |                                   |      | 16 |
| CVD-20 | Statin                 | Patients with history of MI | Post-28-day MI case-fatality rate | -27% | 10 |
| CVD-23 | Cardiac rehabilitation |                             |                                   | -31% | 19 |

### *Post-stroke*

|        |                          |                                 |                                       |      |   |
|--------|--------------------------|---------------------------------|---------------------------------------|------|---|
| CVD-27 | ACE-Inhibitor + diuretic | Patients with history of stroke | Post-28-day stroke case-fatality rate | -42% | 8 |
|--------|--------------------------|---------------------------------|---------------------------------------|------|---|

### *Post-ischemic stroke*

|        |         |                                          |                                                |      |    |
|--------|---------|------------------------------------------|------------------------------------------------|------|----|
| CVD-25 | Aspirin |                                          |                                                | -30% | 11 |
| CVD-26 | Statin  | Patients with history of ischemic stroke | Post-28-day ischemic stroke case-fatality rate | -28% | 10 |

### *Congestive heart failure*

|        |                   |                                        |                    |      |    |
|--------|-------------------|----------------------------------------|--------------------|------|----|
| CVD-29 | Diuretics         |                                        |                    | -75% | 20 |
| CVD-30 | ACE inhibitors    |                                        |                    | -11% | 21 |
| CVD-31 | Beta blockers     | Patients with congestive heart failure | Case-fatality rate | -22% | 22 |
| CVD-32 | Exercise training |                                        |                    | -35% | 23 |

## References.

1. Frost CD, Law MR, Wald NJ. By how much does dietary salt reduction lower blood pressure? II-- Analysis of observational data within populations. *BMJ* 1991; 302: 815-8.
2. Law MR, Frost CD, Wald NJ. By how much does dietary salt reduction lower blood pressure? III-- Analysis of data from trials of salt reduction. *BMJ* 1991; 302: 819-24.
3. Lawes C, Feigin V, Rodgers A. Estimating reductions in blood pressure following reductions in salt intake by age, sex and WHO region. Auckland: Clinical Trials Research Unit, University of Auckland.
4. Tosteson AN, Weinstein MC, Hunink MG, Mittleman MA, Williams LW, Goldman PA, Goldman L. Cost-effectiveness of population wide educational approaches to reduce serum cholesterol levels. *Circulation* 1997; 95: 24-30.
5. Collins R, Peto R, MacMahon S, Hebert P, Fiebach NH, Eberlein KA, et al. Blood pressure, stroke, and coronary heart disease. Part 2, short-term reductions in blood pressure: overview of randomised drug trials in their epidemiological context. *The Lancet* 1990;335:827-838
6. MacMahon S, Rodgers A. The effects of anti-hypertensive treatment on vascular disease:reappraisal of the evidence in 1994. *J Vascular Medicine and Biology* 1993;4:265-71.
7. Blood Pressure Lowering Treatment Trialists' Collaboration. Effects of ACE inhibitors, calcium antagonists, and other blood-pressure-lowering drugs: results of prospectively designed overviews of randomised trials. *Lancet* 2000;356(9246):1955-64.
8. Progress Collaborative Group. Randomised trial of a perindopril-based blood-pressure-lowering regimen among 6,105 individuals with previous stroke or transient ischaemic attack. *Lancet* 2001;358(9287):1033-41.
9. The ALLHAT Officers and Coordinators for the ALLHAT Collaborative Research Group. Major Outcomes in High-Risk Hypertensive Patients Randomized to Angiotensin-Converting Enzyme Inhibitor or Calcium Channel Blocker vs Diuretic The Antihypertensive and Lipid-Lowering Treatment to Prevent Heart Attack Trial (ALLHAT). *JAMA* 2002;288(23):2981-97.

10. Baigent C, Keech A, Kearney PM, Blackwell L, Buck G, Pollicino C et al. Efficacy and safety of cholesterol-lowering treatment: prospective meta-analysis of data from 90,056 participants in 14 randomised trials of statins. *Lancet*. 2005;366(9494):1358.
11. Collaborative meta-analysis of randomised trials of antiplatelet therapy for prevention of death, myocardial infarction, and stroke in high risk patients. *BMJ* 2002; 324(7329): 71-86.
12. ACE Inhibitor Myocardial Infarction Collaborative Group. Indications for ACE inhibitors in the early treatment of acute myocardial infarction: systematic overview of individual data from 100 000 patients in randomized trials. *Circulation* 1998;97:2202–2212.
13. [Boersma E, Simoons ML](#). Reperfusion strategies in acute myocardial infarction. *Eur Heart J*. 1997 Nov;18(11):1703-11.
14. [Baigent C, Collins R, Appleby P, Parish S, Sleight P, Peto R](#). ISIS-2: 10 year survival among patients with suspected acute myocardial infarction in randomised comparison of intravenous streptokinase, oral aspirin, both, or neither. The ISIS-2 (Second International Study of Infarct Survival). Collaborative Group. *BMJ*. 1998 May 2;316(7141):1337-43.
15. [Keeley EC, Boura JA, Grines CL](#). Primary angioplasty versus intravenous thrombolytic therapy for acute myocardial infarction: a quantitative review of 23 randomised trials. *Lancet*. 2003 Jan 4;361(9351):13-20. Review.
16. [Freemantle N, Cleland J, Young P, Mason J, Harrison J](#). Beta Blockade after myocardial infarction: systematic review and meta regression analysis. *BMJ*. 1999 Jun 26;318(7200):1730-7.
17. Stroke Unit Trialists' Collaboration. Collaborative systematic review of the randomised trials of organised inpatient (stroke unit) care after stroke. *BMJ*. 1997 Apr 19;314(7088):1151-9.
18. [Teo KK, Yusuf S, Pfeffer M, Torp-Pedersen C, Kober L, Hall A, Pogue J, Latini R, Collins R; ACE Inhibitors Collaborative Group](#). Effects of long-term treatment with angiotensin-converting-enzyme inhibitors in the presence or absence of aspirin: a systematic review. *Lancet*. 2002 Oct 5;360(9339):1037-43. Review. Erratum in: *Lancet* 2003 Jan 4;361(9351):90.
19. [Jolliffe JA, Rees K, Taylor RS, Thompson D, Oldridge N, Ebrahim S](#). Exercise-based rehabilitation for coronary heart disease. [Cochrane Database Syst Rev](#). 2001;(1):CD001800.
20. [Faris R, Flather M, Purcell H, Henein M, Poole-Wilson P, Coats A](#). Diuretics for heart failure. *Cochrane Database Syst Rev*. 2006 Jan 25;(1):CD003838.
21. Unpublished meta-analysis. Haas et al. 2002
22. [Bouzamondo A, Hulot JS, Sanchez P, Cucherat M, Lechat P](#). Beta-blocker treatment in heart failure. *Fundam Clin Pharmacol*. 2001 Apr;15(2):95-109.
23. [Piepoli ME, Davos C, Francis DP, Coats AJ; ExTraMATCH Collaborative](#). Exercise training meta-analysis of trials in patients with chronic heart failure (ExTraMATCH). [BMJ](#). 2004 Jan 24;328(7433):189.

Interventions were selected according to the strength of evidence supporting their effectiveness as well as recommendations from the following published guidelines:

1. Antman EM, Anbe DT, Armstrong PW, Bates ER, Green LA, Hand M, Hochman JS, Krumholz HM, Kushner FG, Lamas GA, Mullany CJ, Ornato JP, Pearle DL, Sloan MA, Smith SC, Jr., Alpert JS, Anderson JL, Faxon DP, Fuster V, Gibbons RJ, Gregoratos G, Halperin JL, Hiratzka LF, Hunt SA, Jacobs AK. ACC/AHA guidelines for the management of patients with ST-elevation myocardial infarction: a report of the American College of Cardiology/American Heart Association Task Force on Practice Guidelines (Committee to Revise the 1999 Guidelines for the Management of Patients with Acute Myocardial Infarction). *Circulation*. 2004;110:e82-292.
2. Van de Werf F, Ardissino D, Betriu A, Cokkinos DV, Falk E, Fox KA, Julian D, Lengyel M, Neumann FJ, Ruzyllo W, Thygesen C, Underwood SR, Vahanian A, Verheugt FW, Wijns W. Management of acute myocardial infarction in patients presenting with ST-segment elevation. The Task Force on the Management of Acute Myocardial Infarction of the European Society of Cardiology. *Eur Heart J*. 2003;24:28-66.

3. Hunt SA, Baker DW, Chin MH, Cinquegrani MP, Feldman AM, Francis GS, Ganiats TG, Goldstein S, Gregoratos G, Jessup ML, Noble RJ, Packer M, Silver MA, Stevenson LW, Gibbons RJ, Antman EM, Alpert JS, Faxon DP, Fuster V, Jacobs AK, Hiratzka LF, Russell RO, Smith SC, Jr. ACC/AHA guidelines for the evaluation and management of chronic heart failure in the adult: executive summary. A report of the American College of Cardiology/American Heart Association Task Force on Practice Guidelines (Committee to revise the 1995 Guidelines for the Evaluation and Management of Heart Failure). *J Am Coll Cardiol*. 2001;38:2101-13.
4. Remme WJ, Swedberg K. Guidelines for the diagnosis and treatment of chronic heart failure. *Eur Heart J*. 2001;22:1527-60.
5. National Collaborating Centre for Chronic Conditions. Chronic Heart Failure. Management of Chronic Heart failure in adults in primary and secondary care. In: National Institute for Clinical Excellence; 2003.
6. Intercollegiate Stroke Working Party. *National clinical guidelines for stroke*. 2nd ed. London: Royal College of Physicians of London; 2004.

## Appendix 4 Modelling the impact and costs of diabetes interventions

### Interventions

| Interventions                                                                | Description                                                                                                                                                                                                                                                                                                                                                                                                                                        | Evidence                                                                                                                                                                                                                                                                                                                                                                                                                                                                                                                                                                                                                                                                      |
|------------------------------------------------------------------------------|----------------------------------------------------------------------------------------------------------------------------------------------------------------------------------------------------------------------------------------------------------------------------------------------------------------------------------------------------------------------------------------------------------------------------------------------------|-------------------------------------------------------------------------------------------------------------------------------------------------------------------------------------------------------------------------------------------------------------------------------------------------------------------------------------------------------------------------------------------------------------------------------------------------------------------------------------------------------------------------------------------------------------------------------------------------------------------------------------------------------------------------------|
| A. Intensive glycemic control                                                | <i>The administration of oral sulphonylureas or insulin to diabetic patients for a goal of HbA1c levels of <math>\leq 7\%</math>.</i>                                                                                                                                                                                                                                                                                                              | Lowering HbA1c levels has been associated with a reduction of microvascular, macrovascular and neuropathic complications of diabetes. (A)*. A management plan for diabetic patients should be developed or adjusted to achieve normal or near-normal glycemia with an HbA1c goal of <7% (B)*. (Standards of Medical Care for Patients with Diabetes Mellitus, American Diabetes Association, 2003).<br><br>* ADA evidence grading system. A=clear evidence from well conducted, generalizable, randomized controlled trial. B=Supportive evidence from well conducted cohort studies.                                                                                         |
| B. Screening for retinopathy followed by photocoagulation                    | <i>Case detection of diabetic proliferative retinopathy and macular edema and treatment with laser photocoagulation of suitable cases.</i>                                                                                                                                                                                                                                                                                                         | Early detection of sight threatening retinopathy and treatment by laser therapy has been shown to be effective in preventing the onset of visual impairment. (UK National Screening Committee [NSC]*, 2000).<br><br>*The NSC assesses proposed new screening programmes for the UK against a set of internationally recognised criteria covering the condition, the test, the treatment options and effectiveness and acceptability of the screening programme. In forming its proposals, the NSC draws on the latest research evidence and the skills of specially convened multi-disciplinary expert groups, which always include patient and service user representatives. |
| C. Screening for diabetic foot risk factors followed by preventive foot care | <i>Identification of feet at risk for potential foot problems and classification of patients according to risk factors by checking for loss of sensitivity to touch, vascular status, foot deformities and previous history of ulcer/amputation. Referral of high risk patients for periodical examination by a multidisciplinary team. Provision of appropriate footwear, insoles, skin and nail care and foot care education at each review.</i> | Implementing a screening and protection programme for patients with gross risk factors for ulceration reduces morbidity and is cost effective. (1b)* (Clinical guidelines and evidence review on prevention and management of foot problems, Royal College of General Practitioners UK, 2003).<br><br>*Agency for Health Care Policy Research grading framework. 1b=Evidence from at least one randomized trial.                                                                                                                                                                                                                                                              |

### Modelling the impact of interventions for diabetes

**MiniMod:** The health outcomes measures or average disability weights for the scenarios simulated in PopMod were calculated by means of a 7 state diabetes model (Figure 1) developed using MiniMod. As opposed to PopMod, MiniMod simulated the evolution of the population as a closed cohort for each of the scenarios studied. A population per region of 100,000 subjects 15 years and older, was followed for 100 years along seven states: 6 diseased states and 1 outcome state or death state. The six disease states reflected the progression of diabetes along the long-term consequences of eye and foot disease. The states included were: diabetes mellitus without complications, neuropathy, lower extremity amputation (LEA), background retinopathy (BR), proliferative diabetic retinopathy + macular edema (PDR+ME), and blindness due to retinopathy. All but two states, BR and PDR+ME, correspond with the states studied in the global burden of diabetes (GBD) 2000 [11]. These two states were included to have an adequate estimate of the health outcomes of the interventions affecting diabetic eye disease, since the effect size of the interventions studied for retinopathy varies among the different disease progression stages (background retinopathy, proliferative diabetic retinopathy and macular edema). The hazard rates, prevalence figures and disability weights per state used in the model were obtained from published studies, the Global Burden of Diabetes 2000 and the Global Burden of Disease [11, 12]. The hazard rates for the BR and PDR+ME states were obtained from the retinopathy model developed for this analysis (see below). The disability weights and mortality rates for these two states were assumed the same as for diabetes without complications. The prevalence of these two conditions in diabetic patients were derived from previous models [13,14] and calculated for general population using the regional population figures from WHO statistics. The output of the model was the average of the disability weights per year experienced by the population over 100 years. The corresponding output for each simulation was then transposed to PopMod to calculate the end health effects.

**Figure 1. MiniMod states and transition paths**

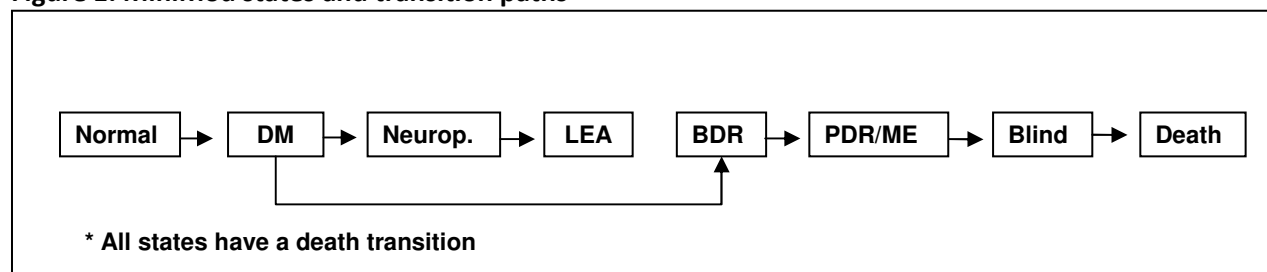

Validation. The input data used for MiniMod was validated by simulating the evolution of a diabetic population under current care (HbA1c=7.9%) using the parameters and information for Euro A region. This simulation was worked in the null sheet of a separate generic MiniMod excel file. The cumulative incidence of neuropathy, lower extremity amputations and blindness due to retinopathy experienced by this cohort of 100,000 diabetic patients was compared to published cumulative incidences [15, 16]. The validation was performed on a diabetic cohort since published figures on incidence of diabetes complications in general population are unavailable. For this same reason, a cohort of type 2 patients was chosen. The resulting cumulative incidences obtained and corresponding published values (in brackets) were: neuropathy: 23.6% (30%-46%), lower extremity amputation: 17.7% (16%-22%) and blindness: 14.1% (12%-19%).



**Retinopathy model:** The effect of the interventions in the transition from diabetes mellitus to severe visual loss/blindness in MiniMod, were simulated in an excel based model which described the onset and progression of diabetic retinopathy along 5 health states. (Figure 2). This model builds on a previous retinopathy model constructed by Eastman et al. [13]. Input information for the model was obtained from the Wisconsin Epidemiologic Diabetic Retinopathy study [17-19]. Incidence rates on 4 clinical endpoints (background diabetic retinopathy, proliferative diabetic retinopathy, macular edema and blindness) were obtained for the 3 cohorts studied in the WEDRS: diabetes mellitus type 1 patients and type 2 patients insulin and non-insulin requiring. Incidence rates are summarized in table 3. Based on the HbA1c levels described in this study, the hazard rates obtained were used to simulate the null scenario for retinopathy (HbA1c=10%). These rates were assumed the same for all the regions studied. The time interval for the transitions among states was defined at 1 year.

**Figure 2. Retinopathy Model states and transition paths**

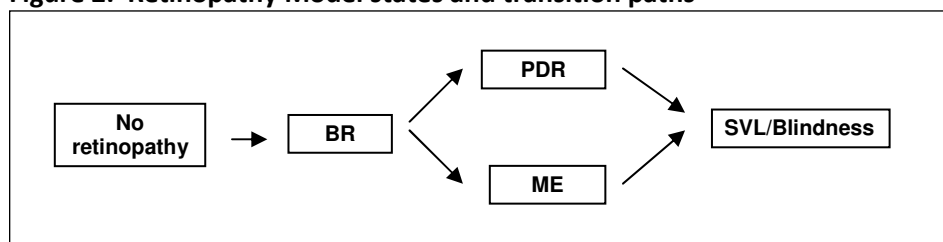

### Modelling the cost of interventions for diabetes

1. **Glycaemic control.** Patient costs for diabetes control included medication, labor, self care, laboratory/procedures and complications costs (see Table below). Calculation of drug use was based on the UKPDS and DCCT experience (3, 4). In the case of type 2 patients, the drug pattern accounted for the fact that patients starting in one treatment arm later switched to alternative therapies. Drug doses for glibenclamide and metformin equaled the maximum dose allowed in the UKPDS. Concerning insulin doses, patients were modeled to receive NPH insulin for the first 14U and regular insulin accounted for the additional units. Cost of insulin for type 1 patients was based in a daily dose of 28 U of regular and NPH insulin, for a median daily insulin dose of 58 U (as per the DCCT). The prices assigned to each medication were taken from the International Drug Price Indicator for 2005 ([www.erc.msh.org](http://www.erc.msh.org)). Labor costs were calculated according to likely standard clinical practice frequency and type of visit as per the UKPDS (4), including contacts with a general practice nurse. A price per visit was assigned according to the level of care (primary, secondary, tertiary) following the WHO price list for outpatient visits. Concerning self-care costs, the source of frequency and resource use of home glucose tests for type 2 patients was the UKPDS cost-effectiveness analysis [7]. This study assumes 1 monthly self-testing of glucose levels for patients in the oral arm and an average of 10 self tests a month for insulin users. Final estimates for type 2 patients were computed according to the proportion of patients receiving each treatment group - insulin or orals - at year 5 (37% insulin and 63% orals). The frequency of home glucose tests for type 1 patients was obtained from the DCCT resource utilization study [5]. This frequency of 4 times a day, correlates well with that recommended by the American Diabetes Association (ADA): 3 or more times day for type 1 patients. The number of lancets and glucose test strips for type 1 and 2 patients were based on the number of self-tests considered and was calculated accordingly. Glycated Hb measures, blood and urinary tests were considered the essential laboratory tests required to determine the metabolic control of diabetic patients in this

study. The frequency of glycated Hb measures was derived from the UKPDS [7] for type 2 patients and from the ADA recommendations for type 1 patients [2]. The frequency of the blood tests was matched to that of HbA1c level measurements. The major side effect described with intensive therapy is hypoglycemia. Complication costs were calculated for major hypoglycemic events. The assumption for this model is that all patients with a major event required 1 emergency room visit, 3 days of hospitalization and 1 extra outpatient visit.

#### Health service use and self care for conventional and intensive diabetes management

|                                        |                            | <i>Conventional glycaemic control</i> | <i>Intensive glycaemic control</i> |
|----------------------------------------|----------------------------|---------------------------------------|------------------------------------|
| <b>Visits</b>                          | General Practice nurse     | 3                                     | 1.1                                |
|                                        | Diabetic nurse             | 0.2                                   | 2.9                                |
|                                        | GP consultation            | 1                                     | 2.0                                |
|                                        | Diabetologist consultation | 0.1                                   | 0.7                                |
| <b>Self care (test &amp; supplies)</b> | Lancet                     | 57                                    | 193.1                              |
|                                        | Glucose meter              | 0.33                                  | 0.3                                |
|                                        | Battery for glucose meter  | 2                                     | 2.4                                |
|                                        | Syringes                   | 204                                   | 474.1                              |
|                                        | Glucose test strips        | 57                                    | 193.1                              |
| <b>Procedure/Laboratory</b>            | Glycated Hb measure        | 1.3                                   | 1.3                                |
|                                        | Blood test                 | 1.3                                   | 1.3                                |
|                                        | Urine test                 | 1.0                                   | 1.0                                |

2. Eye screening followed by photocoagulation. Patient costs for eye screening and photocoagulation were divided into labor and procedure costs. The labor costs included 1 ophthalmologist consultation for referral and 3 ophthalmologist consultations for treatment. The procedure costs included the costs for the laser session. The frequency of outpatient and laser sessions were derived from the average outpatient visits and laser sessions described for the treatment of proliferative retinopathy and macular edema in the UK Diabetic Retinopathy Screening Programme (20). The price of the ophthalmologist consultation corresponded to the outpatient visit price in a secondary level hospital (WHO-CHOICE regional price values were used). The price of a laser session was derived from Medicare reimbursement prices in 1999 and updated to 2005 prices using inflation indices from the Hospital and Community Health Services inflation indices USA [21]. Administrative costs of the screening and photocoagulation program were also calculated using standard WHO-CHOICE methods. Other program costs were calculated separately since they are variable costs depending on the number of patients screened. These costs included 1) the costs of the screening office in charge of the register, call and recall system of the program, 2) the costs of performing the screening test, including the costs of maintenance of the digital cameras and camera transport expenses, (in the case of digital retinal screening) among others, 3) the costs of the internal quality assurance of the program and 4) the initial setting-up costs of the program which includes the capital costs of the program and the variable training costs. The capital costs included the cost of the digital retinal camera or slit lamp camera. The number of retinal cameras and slit lamp cameras purchased in each region was calculated on the basis of 1 retinal camera per 5,000 patients screened.

3. Foot screening followed by preventive foot care. Patient costs for foot screening and preventive foot care were divided into labor costs, costs for protective foot-ware and patient education costs. The labor costs included the consultation visits required for the preventive follow up of high-risk patients. The frequency of annual visits followed the recommendations of the International Working Group on the Diabetic Foot (IWGDF). The price per outpatient visit corresponded to the price per visit in a secondary hospital level. Costs for protective foot-ware included the costs for shoe inlays and protective shoes (depth shoes). Three insoles and 1 pair of protective shoes per year per patient were calculated according to the International Consensus on the Diabetic Foot and Medicare's coverage for diabetic shoes. The price of the shoes inlays and protective shoes were the lowest prices available at Internet sites for diabetic devices ([www.feetnet.com/diab/shoe/medicare.html](http://www.feetnet.com/diab/shoe/medicare.html), [www.bigfeetstuff.com](http://www.bigfeetstuff.com)). Patient education costs were calculated in terms of the extra time per visit spent in patient advisory. Five minutes per visit were calculated for a total annual education time of 20 minutes per patient. Education leaflets for patients and physicians/podiatrists were also included.

The basic administrative costs of the foot screening and preventive foot care program were calculated using standard WHO-CHOICE methods. Other program costs included were 1) the costs associated with the administration of the screening office 2) the costs of performing the screening test and 3) the initial setting up costs. These costs were performed separately since their calculation depended on the number of patients screened (variable costs).

#### References:

1. The Royal College of General Practitioners. Clinical Guidelines for Type 2 Diabetes. 2002.
2. Standards of medical care for patients with diabetes mellitus. *Diabetes Care*, 2003. **26 Suppl 1**: p. S33-50.
3. The Diabetes Control and Complications Trial Research Group. The effect of intensive treatment of diabetes on the development and progression of long-term complications in insulin-dependent diabetes mellitus. *N Engl J Med*, 1993. **329**(14): p. 977-86.
4. UK Prospective Diabetes Study (UKPDS) Group. UKPDS, Intensive blood-glucose control with sulphonylureas or insulin compared with conventional treatment and risk of complications in patients with type 2 diabetes (UKPDS 33). *Lancet*, 1998. **352**(9131): p. 837-53.
5. Resource utilization and costs of care in the diabetes control and complications trial. *Diabetes Care*, 1995. **18**(11): p. 1468-78.
6. Insulin administration. *Diabetes Care*, 2003. **26 Suppl 1**: p. S121-4.
7. Gray, A., et al., Cost effectiveness of an intensive blood glucose control policy in patients with type 2 diabetes: economic analysis alongside randomised controlled trial (UKPDS 41). United Kingdom Prospective Diabetes Study Group. *Bmj*, 2000. **320**(7246): p. 1373-8.
8. Complications of diabetes: Screening for Retinopathy, Management of Foot Ulcers. 1999, NHS Centre for Reviews and Dissemination.
9. Apelqvist, J. and J. Larsson, What is the most effective way to reduce incidence of amputation in the diabetic foot? *Diabetes Metab Res Rev*, 2000. **16 Suppl 1**: p. S75-83.
10. International Working Group on the Diabetic Foot, International Consensus on The Diabetic Foot, Amsterdam, the International Working Group on the Diabetic Foot. 1999.
11. Wild S, Sicree R, Green A, King H., The Global Burden of Diabetes Mellitus in the year 2000. 2003, World Health Organization.
12. Murray CJL et al. The global burden of disease. 1996: Cambridge MA: Harvard University Press, 1996.

13. Eastman R.C., et al., 57. Model of complications of NIDDM. I. Model construction and assumptions. *Diabetes Care*, Volume 20, number 5: 725-43, 1997.
14. Bachmann, M.O. and Nelson SJ., Impact of diabetic retinopathy screening on a British district population: case detection and blindness prevention in an evidence-based model. *J Epidemiol Community Health*, 1998. **52**(1): p. 45-52.
15. The CDC Diabetes Cost-effectiveness group, Cost-effectiveness of intensive glycemic control, intensified hypertension control, and serum cholesterol level reduction for type 2 diabetes. *Jama*, 2002. **287**(19): p. 2542-51.
16. Eastman, R.C., et al., Model of complications of NIDDM. II. Analysis of the health benefits and cost-effectiveness of treating NIDDM with the goal of normoglycemia. *Diabetes Care*, 1997. **20**(5): p. 735-44.
17. Javitt, J.C., et al., Detecting and treating retinopathy in patients with type I diabetes mellitus. A health policy model. *Ophthalmology*, 1990. **97**(4): p. 483-94; discussion 494-5.
18. Javitt, J.C., et al., Preventive eye care in people with diabetes is cost-saving to the federal government. Implications for health-care reform. *Diabetes Care*, 1994. **17**(8): p. 909-17.
19. Javitt, J.C. and L.P. Aiello, Cost-effectiveness of detecting and treating diabetic retinopathy. *Ann Intern Med*, 1996. **124**(1 Pt 2): p. 164-9.
20. Nacional Screening Comité UK, 2000. Workbook and standards available from: [www.retinalscreening.nhs.uk](http://www.retinalscreening.nhs.uk).  
Unit costs of Health and Social Care. ONS Statistics.

## Appendix 5 Patient-level resource use for CVD interventions

| Primary Prevention |                                                                                                                                                          |                                                                                            |                                                                                                                                                                                                      |                                                                                                  |
|--------------------|----------------------------------------------------------------------------------------------------------------------------------------------------------|--------------------------------------------------------------------------------------------|------------------------------------------------------------------------------------------------------------------------------------------------------------------------------------------------------|--------------------------------------------------------------------------------------------------|
| Intervention code  | Drug treatment                                                                                                                                           | Hospitalisation/Provider visits                                                            | Laboratory tests                                                                                                                                                                                     | Adverse events/others                                                                            |
| CVD-4<br>CVD-5     | 50 mg/d atenolol<br>25 mg/d hidrochlorotiazide                                                                                                           | 4 health centre visits/year<br>1.5 outpatient hospital visits/year<br>for health education | Frequency: once per year<br>Renal function<br>Lipid profile<br>Blood glucose                                                                                                                         | None                                                                                             |
| CVD-6<br>CVD-7     | 30 mg/d lovastatin                                                                                                                                       | 4 health centre visits/year<br>1.5 outpatient hospital visits/year<br>for health education | Frequency: once per year<br>Total cholesterol<br>Hepatic function                                                                                                                                    | None                                                                                             |
| CVD-8 to CVD-11    | 50 mg/d atenolol<br>25 mg/d hidrochlorotiazide<br>30 mg/d lovastatin<br>100 mg/d aspirin                                                                 | 4 health centre visits/year<br>1.5 outpatient hospital visits/year<br>for health education | Frequency: once per year<br>Renal function<br>Lipid profile<br>Blood glucose<br>Total cholesterol<br>Hepatic function                                                                                | Major GI bleeding<br><br>7 hospital bed days<br>2 units of blood<br>1 endoscopy<br>1 blood count |
| Acute Care         |                                                                                                                                                          |                                                                                            |                                                                                                                                                                                                      |                                                                                                  |
| CVD-12             | 175 mg/d aspirin<br>during first month of acute<br>event                                                                                                 | 9 hospital bed days (2 days in CCU<br>and 7 in a general ward)                             | Frequency: 3 times during hospital stay<br>Complete blood count<br>Prothrombin time (INR)<br>Partial time of thromboplastin<br>Serum electrolytes<br>Renal function<br>Blood glucose<br>Serum lipids | Major GI bleeding<br><br>7 hospital bed days<br>2 units of blood<br>1 endoscopy<br>1 blood count |
| CVD-14             | Captopril, starting dose<br>6.25mg/d, 12.5 mg 2 hrs<br>later and 25 mg 10-12 hrs<br>later for the first 24 hrs.<br>From then on 50mg bid for<br>4 weeks. | 9 hospital bed days (2 days in CCU<br>and 7 in a general ward)                             | Frequency: 3 times during hospital stay<br>Complete blood count<br>Prothrombin time (INR)<br>Partial time of thromboplastin<br>Serum electrolytes<br>Renal function<br>Blood glucose<br>Serum lipids | None                                                                                             |

|        |                                                                                                                       |                                                             |                                                                                                                                                                                                      |                                                                                                                                                                                                                                                                                                                                                                                                                                                                                    |
|--------|-----------------------------------------------------------------------------------------------------------------------|-------------------------------------------------------------|------------------------------------------------------------------------------------------------------------------------------------------------------------------------------------------------------|------------------------------------------------------------------------------------------------------------------------------------------------------------------------------------------------------------------------------------------------------------------------------------------------------------------------------------------------------------------------------------------------------------------------------------------------------------------------------------|
| CVD-16 | Propranolol 60 mg/tid starting 2 days after infarction and for the the first month of acute event.                    | 9 hospital bed days (2 days in CCU and 7 in a general ward) | Frequency: 3 times during hospital stay<br>Complete blood count<br>Prothrombin time (INR)<br>Partial time of thromboplastin<br>Serum electrolytes<br>Renal function<br>Blood glucose<br>Serum lipids | None                                                                                                                                                                                                                                                                                                                                                                                                                                                                               |
| CVD-19 | Sreptokinase 1.5 MU single dose                                                                                       | 9 hospital bed days (2 days in CCU and 7 in a general ward) | Frequency: 3 times during hospital stay<br>Complete blood count<br>Prothrombin time (INR)<br>Partial time of thromboplastin<br>Serum electrolytes<br>Renal function<br>Blood glucose<br>Serum lipids | Major bleeding event:<br>7 days in hospital bed stay<br>2 units of blood<br>1 endoscopy<br>1 blood count                                                                                                                                                                                                                                                                                                                                                                           |
| CVD-20 | IV Heparin 70-100 IU/kg (85 IU/kg average) during first 2 days<br>Aspirin 175 mg/d during the 6 days of hospital stay | 6 hospital bed days (2 days in CCU and 4 in a general ward) | Frequency: 3 times during hospital stay<br>Complete blood count<br>Prothrombin time (INR)<br>Partial time of thromboplastin<br>Serum electrolytes<br>Renal function<br>Blood glucose<br>Serum lipids | - Supplies:<br>2 Balloon catheter<br>1 Guiding catheter<br>1 Guidewire<br>Radiographic contrast and other intra surgery supplies<br><br>- Professional fees per procedure (angiography + angioplasty):<br>1 Interventional cardiologist<br>1 technical radiologist<br>2 Nurses<br>1 Radiographer<br><br>- Operating room costs (equipment, admission, anesthetics, administrative) equivalent to 41% of total costs:<br><br>- Major bleeding event:<br>7 days in hospital bed stay |

|                                          |                                                                   |                                                                                                       |                                                                                                                                                                                                       |                                                                                                                                                    |
|------------------------------------------|-------------------------------------------------------------------|-------------------------------------------------------------------------------------------------------|-------------------------------------------------------------------------------------------------------------------------------------------------------------------------------------------------------|----------------------------------------------------------------------------------------------------------------------------------------------------|
|                                          |                                                                   |                                                                                                       |                                                                                                                                                                                                       | 2 units of blood<br>1 blood count                                                                                                                  |
| CVD-26                                   | Medication use calculated as a percentage of acute bed day costs. | 11 hospital bed days in an acute stroke unit ward,<br>17 hospital bed days in a non acute stroke ward | Frequency: once per week of hospital stay<br>Complete blood count<br>Prothrombin time (INR)<br>Partial time of thromboplastin<br>Electrolytes<br>Renal function (BUN, Creatinine)<br>Hepatic function | Extra staff costs: full time stroke nurse and part time occupational therapist and physiotherapist, costed as a percentage of acute bed day costs. |
| CVD-22                                   | Aspirin 300 mg/d                                                  | 30 hospital bed days                                                                                  | Frequency: once per week of hospital stay<br>Complete blood count<br>Prothrombin time (INR)<br>Partial time of thromboplastin<br>Electrolytes<br>Renal function (BUN, Creatinine)<br>Hepatic function | Major bleeding event:<br>7 days in hospital bed stay<br>2 units of blood<br>1 endoscopy<br>1 blood count                                           |
| <b>Secondary and Tertiary Prevention</b> |                                                                   |                                                                                                       |                                                                                                                                                                                                       |                                                                                                                                                    |
| CVD-13                                   | Aspirin 75 mg/d                                                   | 4 health centre visits/year                                                                           | Frequency: once per year<br>Renal function (BUN, Creatinine)<br>Total cholesterol<br>Liver function (ALT, ALP, AST, Brr, Alb, Tprot)                                                                  | Major bleeding event:<br>7 days in hospital bed stay<br>2 units of blood<br>1 endoscopy<br>1 blood count                                           |
| CVD-15                                   | Captopril 50 mg/tid                                               | 4 health centre visits/year                                                                           | Frequency: once per year<br>Renal function (BUN, Creatinine)<br>Total cholesterol<br>Liver function (ALT, ALP, AST, Brr, Alb, Tprot)                                                                  | None                                                                                                                                               |
| CVD-17                                   | Propranolol 60 mg/tid                                             | 4 health centre visits/year                                                                           | Frequency: once per year<br>Renal function (BUN, Creatinine)<br>Total cholesterol<br>Liver function (ALT, ALP, AST, Brr, Alb, Tprot)                                                                  | None                                                                                                                                               |
| CVD-18                                   | Lovastatin 40 mg/d                                                | 4 health centre visits/year                                                                           | Frequency: once per year                                                                                                                                                                              | None                                                                                                                                               |

|        |                                          |                                                            |                                                                                                                                                            |                                                                                                                                                                                                   |
|--------|------------------------------------------|------------------------------------------------------------|------------------------------------------------------------------------------------------------------------------------------------------------------------|---------------------------------------------------------------------------------------------------------------------------------------------------------------------------------------------------|
|        |                                          |                                                            | Renal function (BUN, Creatinine)<br>Total cholesterol<br>Liver function (ALT, ALP, AST, Brr, Alb, Tprot)                                                   |                                                                                                                                                                                                   |
| CVD-21 | Non                                      | 1 outpatient hospital visit for initial medical evaluation | Frequency: once during first year.<br>CBC<br>Serum lipids<br>Exercise stress test                                                                          | During first year:<br>- 1 consultation with an exercise professional for exercise prescription<br>-3 sessions of individual supervised training<br>Annually:<br>-3 annual exercise group sessions |
| CVD-25 | Perindopril 4 mg/d<br>Indapamide 2.5mg/d | 4 health centre visits/year                                | Frequency: once per year<br>Total cholesterol<br>Liver function (ALT, ALP, AST, Brr, ALb, TProt)<br>Renal function (BUN, creatinine)<br>Serum electrolytes | None                                                                                                                                                                                              |
| CVD-23 | Aspirin 75 mg/d                          | 4 health centre visits/year                                | Frequency: once per year<br>Total cholesterol<br>Liver function (ALT, ALP, AST, Brr, ALb, TProt)<br>Renal function (BUN, creatinine)<br>Serum electrolytes | Major bleeding event:<br>7 days in hospital bed stay<br>2 units of blood<br>1 endoscopy<br>1 blood count                                                                                          |
| CVD-24 | Lovastatin 40 mg/d                       | 4 health centre visits/year                                | Frequency: once per year<br>Total cholesterol<br>Liver function (ALT, ALP, AST, Brr, ALb, TProt)<br>Renal function (BUN, creatinine)<br>Serum electrolytes | None                                                                                                                                                                                              |
| CVD-27 | Furosemide 40 mg/d                       | 4 health centre visits/year                                | - First year:<br>CBC<br>Urinalysis<br>Electrolytes (Na, K, Ca and Mg)<br>Renal function (BUN, Creatinine)<br>Blood glucose<br>Liver function tests         | None                                                                                                                                                                                              |



|        |                     |                                                            |                                                                                                                                                                                                                                  |                                                                                                                                                                                                       |
|--------|---------------------|------------------------------------------------------------|----------------------------------------------------------------------------------------------------------------------------------------------------------------------------------------------------------------------------------|-------------------------------------------------------------------------------------------------------------------------------------------------------------------------------------------------------|
|        |                     |                                                            | TSH<br>- Annual:<br>Serum electrolytes<br>Renal function (BUN, creatinine)                                                                                                                                                       |                                                                                                                                                                                                       |
| CVD-28 | Captopril 50 mg/tid | 4 health centre visits/year                                | - First year:<br>CBC<br>Urinalysis<br>Electrolytes (Na, K, Ca and Mg)<br>Renal function (BUN, Creatinine)<br>Blood glucose<br>Liver function tests<br>TSH<br>- Annual:<br>Serum electrolytes<br>Renal function (BUN, creatinine) | None                                                                                                                                                                                                  |
| CVD-29 | Metoprolol 200mg/d  | 4 health centre visits/year                                | - First year:<br>CBC<br>Urinalysis<br>Electrolytes (Na, K, Ca and Mg)<br>Renal function (BUN, Creatinine)<br>Blood glucose<br>Liver function tests<br>TSH<br>- Annual:<br>Serum electrolytes<br>Renal function (BUN, creatinine) | None                                                                                                                                                                                                  |
| CVD-30 | Non                 | 1 outpatient hospital visit for initial medical evaluation | Frequency: once during first year<br><br>CBC<br>Serum lipids<br>Exercise stress test                                                                                                                                             | During first year:<br>- 1 consultation with an exercise professional for exercise prescription<br>- 4 exercise training sessions with medical supervision.<br>Annually:<br>-3 exercise group sessions |
