# Supplementary material
Source: PubMed Central journal article supplement (PMC4790010)
Supplement: ortm856005.ww2_default.pdf [file ortm856005.ww2_default.pdf]

## Appendix 6 Full results – costs\*, effects and cost-effectiveness of interventions

|                                               |                                                           | WHO African sub-region AfrE                 |                              |                                                                 |                                                                     | WHO south-east Asian sub-region SearD       |                              |                                                                 |                                                                     |
|-----------------------------------------------|-----------------------------------------------------------|---------------------------------------------|------------------------------|-----------------------------------------------------------------|---------------------------------------------------------------------|---------------------------------------------|------------------------------|-----------------------------------------------------------------|---------------------------------------------------------------------|
|                                               |                                                           | Annual DALYs saved per 1 million population | Annual cost (I\$) per capita | Average CER (I\$ per DALY averted, relative to no intervention) | Incremental CER (I\$ per DALY averted, within intervention cluster) | Annual DALYs saved per 1 million population | Annual cost (I\$) per capita | Average CER (I\$ per DALY averted, relative to no intervention) | Incremental CER (I\$ per DALY averted, within intervention cluster) |
| <b>CVD prevention: control of tobacco use</b> |                                                           |                                             |                              |                                                                 |                                                                     |                                             |                              |                                                                 |                                                                     |
| TOB-1                                         | Current Scenario (tax at current rates)                   | 412                                         | 0.31                         | 747                                                             | Dominated                                                           | 2,284                                       | 0.27                         | 116                                                             | Dominated                                                           |
| TOB-2                                         | Increased taxation                                        | 687                                         | 0.31                         | 448                                                             | 448                                                                 | 3,043                                       | 0.27                         | 87                                                              | 87                                                                  |
| TOB-3                                         | Comprehensive advertising ban                             | 119                                         | 0.17                         | 1,394                                                           | Dominated                                                           | 701                                         | 0.13                         | 187                                                             | Dominated                                                           |
| TOB-4                                         | Clean indoor air laws                                     | 101                                         | 0.14                         | 1,365                                                           | Dominated                                                           | 667                                         | 0.11                         | 162                                                             | Dominated                                                           |
| TOB-5                                         | Information and labelling                                 | 200                                         | 0.31                         | 1,570                                                           | Dominated                                                           | 1,164                                       | 0.23                         | 195                                                             | Dominated                                                           |
| TOB-6                                         | Nicotine Replacement therapy                              | 30                                          | 0.38                         | 12,770                                                          | Dominated                                                           | 184                                         | 0.62                         | 3,362                                                           | Dominated                                                           |
| TOB-7                                         | Brief advice                                              | 31                                          | 0.12                         | 3,875                                                           | Dominated                                                           | 188                                         | 0.18                         | 958                                                             | Dominated                                                           |
| TOB-8                                         | Counselling                                               | 35                                          | 0.16                         | 4,663                                                           | Dominated                                                           | 201                                         | 0.24                         | 1,179                                                           | Dominated                                                           |
| TOB-9                                         | Tax increase + Ad Ban                                     | 786                                         | 0.45                         | 573                                                             | Dominated                                                           | 3,650                                       | 0.38                         | 103                                                             | Dominated                                                           |
| TOB-10                                        | Tax increase + Clean indoor air                           | 768                                         | 0.42                         | 552                                                             | Dominated                                                           | 3,617                                       | 0.36                         | 98                                                              | 156                                                                 |
| TOB-11                                        | Tax increase + Information/labelling                      | 864                                         | 0.59                         | 683                                                             | Dominated                                                           | 4,102                                       | 0.47                         | 114                                                             | Dominated                                                           |
| TOB-12                                        | Tax increase + NRT                                        | 699                                         | 0.66                         | 938                                                             | Dominated                                                           | 3,147                                       | 0.84                         | 268                                                             | Dominated                                                           |
| TOB-13                                        | Tax increase + Brief advice                               | 699                                         | 0.41                         | 581                                                             | Dominated                                                           | 3,150                                       | 0.42                         | 134                                                             | Dominated                                                           |
| TOB-14                                        | Tax increase + Counselling                                | 703                                         | 0.45                         | 634                                                             | Dominated                                                           | 3,163                                       | 0.48                         | 151                                                             | Dominated                                                           |
| TOB-15                                        | Tax increase + Ad Ban + Clean Indoor Air                  | 885                                         | 0.58                         | 658                                                             | 1,384                                                               | 4,300                                       | 0.48                         | 112                                                             | 182                                                                 |
| TOB-16                                        | Tax increase + Ad Ban + Info/labelling                    | 980                                         | 0.75                         | 763                                                             | Dominated                                                           | 4,785                                       | 0.59                         | 124                                                             | Dominated                                                           |
| TOB-17                                        | Tax increase + Ad Ban + NRT                               | 815                                         | 0.81                         | 998                                                             | Dominated                                                           | 3,830                                       | 0.97                         | 252                                                             | Dominated                                                           |
| TOB-18                                        | Tax increase + Ad Ban + Brief advice                      | 816                                         | 0.56                         | 691                                                             | Dominated                                                           | 3,833                                       | 0.55                         | 143                                                             | Dominated                                                           |
| TOB-19                                        | Tax increase + Ad Ban + Counselling                       | 819                                         | 0.60                         | 737                                                             | Dominated                                                           | 3,846                                       | 0.60                         | 157                                                             | Dominated                                                           |
| TOB-20                                        | Tax increase + Clean indoor air + Info/labelling          | 963                                         | 0.72                         | 750                                                             | Dominated                                                           | 4,752                                       | 0.57                         | 120                                                             | Dominated                                                           |
| TOB-21                                        | Tax increase + Clean indoor air + NRT                     | 797                                         | 0.79                         | 987                                                             | Dominated                                                           | 3,796                                       | 0.94                         | 249                                                             | Dominated                                                           |
| TOB-22                                        | Tax increase + Clean indoor air + Brief advice            | 798                                         | 0.54                         | 673                                                             | Dominated                                                           | 3,800                                       | 0.53                         | 138                                                             | Dominated                                                           |
| TOB-23                                        | Tax increase + Clean indoor air + Counselling             | 802                                         | 0.58                         | 720                                                             | Dominated                                                           | 3,812                                       | 0.58                         | 152                                                             | Dominated                                                           |
| TOB-24                                        | Tax increase + Info/labelling + NRT                       | 893                                         | 0.95                         | 1,067                                                           | Dominated                                                           | 4,282                                       | 1.06                         | 247                                                             | Dominated                                                           |
| TOB-25                                        | Tax increase + Info/labelling + Brief advice              | 894                                         | 0.70                         | 787                                                             | Dominated                                                           | 4,285                                       | 0.64                         | 149                                                             | Dominated                                                           |
| TOB-26                                        | Tax increase + Info/labelling + Counselling               | 898                                         | 0.74                         | 828                                                             | Dominated                                                           | 4,298                                       | 0.69                         | 161                                                             | Dominated                                                           |
| TOB-27                                        | Tax increase + Ad Ban + Clean Indoor Air + Info/labelling | 1,051                                       | 0.86                         | 815                                                             | 1,645                                                               | 5,296                                       | 0.68                         | 128                                                             | 198                                                                 |
| TOB-28                                        | Tax increase + Ad Ban + Clean Indoor Air + NRT            | 890                                         | 0.92                         | 1,034                                                           | Dominated                                                           | 4,365                                       | 1.04                         | 238                                                             | Dominated                                                           |

|                                     |                                                                                    |       |      |       |           |       |      |         |           |
|-------------------------------------|------------------------------------------------------------------------------------|-------|------|-------|-----------|-------|------|---------|-----------|
| TOB-29                              | Tax increase + Ad Ban + Clean Indoor Air + Brief advice                            | 891   | 0.68 | 760   | Dominated | 4,368 | 0.63 | 145     | Dominated |
| TOB-30                              | Tax increase + Ad Ban + Clean Indoor Air + Counselling                             | 895   | 0.72 | 800   | Dominated | 4,381 | 0.69 | 157     | Dominated |
| TOB-31                              | Tax increase + Clean Indoor Air + Info/labelling + NRT                             | 967   | 1.06 | 1,093 | Dominated | 4,805 | 1.13 | 235     | Dominated |
| TOB-32                              | Tax increase + Clean Indoor Air + Info/labelling + Brief advice                    | 967   | 0.81 | 841   | Dominated | 4,808 | 0.72 | 150     | Dominated |
| TOB-33                              | Tax increase + Clean Indoor Air + Info/labelling + Counselling                     | 971   | 0.85 | 877   | Dominated | 4,821 | 0.77 | 161     | Dominated |
| TOB-34                              | Tax increase + Ad Ban + Clean Indoor Air + Info/labelling + NRT                    | 1,051 | 1.18 | 1,120 | Dominated | 5,327 | 1.22 | 228     | Dominated |
| TOB-35                              | Tax increase + Ad Ban + Clean Indoor Air + Info/labelling + Brief advice           | 1,052 | 0.94 | 894   | Dominated | 5,330 | 0.82 | 154     | 4,176     |
| TOB-36                              | Tax increase + Ad Ban + Clean Indoor Air + Info/labelling + Counselling            | 1,056 | 0.98 | 927   | 28,082    | 5,342 | 0.87 | 163     | 4,229     |
| <b>CVD prevention and treatment</b> |                                                                                    |       |      |       |           |       |      |         |           |
| CVD-1                               | Reduced dietary salt intake - voluntary (15%)                                      | 276   | 0.16 | 591   | Dominated | 330   | 0.07 | 197     | Dominated |
| CVD-2                               | Reduced dietary salt intake - legislated (30%)                                     | 509   | 0.16 | 321   | Dominated | 0     | 0.07 | 901,991 | Dominated |
| CVD-3                               | Reduced population-level cholesterol via mass media campaign                       | 472   | 0.27 | 581   | Dominated | 805   | 0.15 | 191     | Dominated |
| CVD-4                               | Individual drug treatment for hypertension (SBP > 140) + education                 | 4,616 | 1.81 | 393   | Dominated | 4,128 | 2.00 | 484     | Dominated |
| CVD-5                               | Individual drug treatment for hypertension (SBP > 160) + education                 | 3,317 | 0.47 | 141   | Dominated | 2,409 | 0.34 | 142     | Dominated |
| CVD-6                               | Individual cholesterol treatment (> 5.7 mmol/l)                                    | 1,862 | 1.37 | 734   | Dominated | 3,692 | 3.18 | 862     | Dominated |
| CVD-7                               | Individual cholesterol treatment (> 6.2 mmol/l)                                    | 1,346 | 0.78 | 582   | Dominated | 2,729 | 1.87 | 683     | Dominated |
| CVD-8                               | Preventive multi-drug treatment (>5% risk of CVD event)                            | 5,817 | 2.33 | 401   | 3,931     | 7,271 | 3.84 | 528     | 1,817     |
| CVD-9                               | Combination drug treatment (>15% risk of CVD event)                                | 4,504 | 0.96 | 212   | Dominated | 5,340 | 1.68 | 314     | Dominated |
| CVD-10                              | Combination drug treatment (>25% risk of CVD event)                                | 3,689 | 0.51 | 139   | Dominated | 3,979 | 0.80 | 201     | Dominated |
| CVD-11                              | Preventive multi-drug treatment (>35% risk of CVD event)                           | 3,163 | 0.33 | 104   | 104       | 2,984 | 0.41 | 138     | 146       |
| CVD-12                              | Combination of population-based hypertension & cholesterol control (CVD-1 + CVD-3) | 989   | 0.37 | 370   | Dominated | 1,416 | 0.19 | 135     | Dominated |
| CVD-13                              | Combination of individual-based hypertension & cholesterol control (CVD-5 + CVD-7) | 4,132 | 0.90 | 218   | Dominated | 4,764 | 2.21 | 464     | Dominated |

| <b>CVD treatment: Acute care of IHD / stroke</b>           |                                                                              |     |      |        |           |     |      |        |           |
|------------------------------------------------------------|------------------------------------------------------------------------------|-----|------|--------|-----------|-----|------|--------|-----------|
| CVD-14                                                     | Treatment of acute MI in hospital with aspirin                               | 59  | 0.11 | 1,809  | Dominated | 243 | 0.17 | 697    | Dominated |
| CVD-16                                                     | Treatment of acute MI in hospital with ACE inhibitors                        | 17  | 0.13 | 7,303  | Dominated | 71  | 0.20 | 2,790  | Dominated |
| CVD-18                                                     | Treatment of acute MI in hospital with $\beta$ -Blockers                     | 10  | 0.13 | 12,742 | Dominated | 40  | 0.20 | 4,856  | Dominated |
| CVD-21                                                     | Treatment of acute MI in hospital with thrombolysis (streptokinase)          | 64  | 0.15 | 2,379  | Dominated | 263 | 0.27 | 1,033  | Dominated |
| CVD-22                                                     | Treatment of acute MI in hospital with primary PTCA (angioplasty)            | 149 | 0.27 | 1,821  | Dominated | 615 | 0.56 | 908    | Dominated |
| CVD-40                                                     | Treatment of acute MI with aspirin + PTCA                                    | 173 | 0.27 | 1,580  | Dominated | 711 | 0.56 | 788    | Dominated |
| CVD-41                                                     | Treatment of acute MI with aspirin + streptokinase                           | 108 | 0.15 | 1,413  | Dominated | 443 | 0.27 | 614    | Dominated |
| CVD-47                                                     | Treatment of acute MI with aspirin + ACEI + streptokinase                    | 117 | 0.15 | 1,311  | Dominated | 483 | 0.28 | 572    | Dominated |
| CVD-49                                                     | Treatment of acute MI with aspirin, ACEI + PTCA                              | 178 | 0.27 | 1,537  | Dominated | 732 | 0.56 | 768    | Dominated |
| CVD-50                                                     | Treatment of acute MI with aspirin, B-blocker + ACEI                         | 79  | 0.13 | 1,610  | Dominated | 325 | 0.20 | 620    | Dominated |
| CVD-33                                                     | Treatment of acute MI with aspirin + $\beta$ -Blocker + ACEi + Streptokinase | 122 | 0.15 | 1,257  | Dominated | 504 | 0.28 | 549    | Dominated |
| CVD-39                                                     | Treatment of acute MI with ASA + $\beta$ -Blocker + ACEI + PTCA              | 180 | 0.27 | 1,515  | Dominated | 743 | 0.56 | 757    | Dominated |
| CVD-49                                                     | Treatment of acute MI with aspirin, ACEI + PTCA                              | 178 | 0.27 | 1,537  | Dominated | 732 | 0.56 | 768    | Dominated |
| CVD-50                                                     | Treatment of acute MI with aspirin, B-blocker + ACEI                         | 79  | 0.13 | 1,610  | Dominated | 325 | 0.20 | 620    | Dominated |
| CVD-28                                                     | Organised stroke unit care                                                   | 43  | 0.80 | 18,555 | Dominated | 54  | 0.85 | 15,772 | Dominated |
| CVD-24                                                     | Treatment of acute ischemic stroke in hospital with aspirin                  | 17  | 0.64 | 38,133 | Dominated | 22  | 0.67 | 30,182 | Dominated |
| <b>CVD treatment: Secondary prevention of IHD / stroke</b> |                                                                              |     |      |        |           |     |      |        |           |
| CVD-15                                                     | Treatment of post-acute IHD with aspirin                                     | 16  | 0.06 | 4,085  | Dominated | 77  | 0.06 | 714    | Dominated |
| CVD-17                                                     | Treatment of post-acute IHD with ACE inhibitors                              | 55  | 0.08 | 1,464  | Dominated | 250 | 0.14 | 565    | Dominated |
| CVD-19                                                     | Treatment of post-acute IHD with $\beta$ -Blockers                           | 51  | 0.07 | 1,316  | Dominated | 237 | 0.08 | 319    | Dominated |
| CVD-20                                                     | Treatment of post-acute IHD with statins                                     | 27  | 0.07 | 2,433  | Dominated | 135 | 0.07 | 539    | Dominated |
| CVD-43                                                     | Treatment of post-acute IHD with aspirin + $\beta$ -Blocker                  | 67  | 0.07 | 1,025  | Dominated | 312 | 0.08 | 265    | Dominated |
| CVD-42                                                     | Treatment of post-acute IHD with aspirin + $\beta$ -Blocker + Statin         | 93  | 0.07 | 791    | Dominated | 428 | 0.10 | 244    | Dominated |
| CVD-34                                                     | Treatment of post-acute IHD with aspirin + $\beta$ -Blocker + statin + ACEI  | 151 | 0.10 | 637    | Dominated | 666 | 0.22 | 329    | Dominated |

|                                                |                                                                                                                      |     |      |       |           |       |      |     |           |
|------------------------------------------------|----------------------------------------------------------------------------------------------------------------------|-----|------|-------|-----------|-------|------|-----|-----------|
| CVD-51                                         | Treatment of post-acute IHD with aspirin, B-Blocker + ACEI                                                           | 125 | 0.08 | 616   | Dominated | 553   | 0.12 | 217 | Dominated |
| CVD-52                                         | Treatment of post-acute IHD with aspirin, B-Blocker + Cardiac rehab                                                  | 138 | 0.08 | 556   | Dominated | 607   | 0.10 | 167 | Dominated |
| CVD-53                                         | Treatment of post-acute IHD with aspirin, B-Blocker, ACEI + Statin                                                   | 151 | 0.08 | 547   | Dominated | 666   | 0.14 | 217 | Dominated |
| CVD-23                                         | Cardiac rehabilitation for post-acute IHD                                                                            | 66  | 0.06 | 917   | Dominated | 307   | 0.04 | 123 | Dominated |
| CVD-25                                         | Treatment of post-acute stroke with aspirin                                                                          | 159 | 0.09 | 571   | Dominated | 221   | 0.07 | 330 | Dominated |
| CVD-26                                         | Treatment of post-acute stroke with statins                                                                          | 308 | 0.11 | 353   | Dominated | 392   | 0.10 | 258 | Dominated |
| CVD-46                                         | Treatment of post-acute stroke with aspirin + statin                                                                 | 461 | 0.11 | 248   | Dominated | 582   | 0.11 | 185 | Dominated |
| CVD-27                                         | Treatment of post-acute stroke with ACE-Inhibitor + diuretic                                                         | 316 | 0.16 | 502   | Dominated | 419   | 0.18 | 436 | Dominated |
| CVD-35                                         | Treatment of post-acute stroke with aspirin + statin + ACEI + diuretic                                               | 745 | 0.19 | 249   | Dominated | 906   | 0.22 | 240 | Dominated |
| CVD-37                                         | Treatment of post-acute IHD and stroke with statins                                                                  | 335 | 0.12 | 354   | Dominated | 526   | 0.15 | 285 | Dominated |
| CVD-48                                         | Treatment of ischemic stroke and MI with aspirin                                                                     | 175 | 0.10 | 556   | Dominated | 298   | 0.10 | 347 | Dominated |
| CVD-29                                         | Treatment of CHF with diuretics                                                                                      | 96  | 0.06 | 626   | Dominated | 402   | 0.03 | 81  | 81        |
| CVD-30                                         | Treatment of CHF with ACE inhibitors                                                                                 | 11  | 0.06 | 6,110 | Dominated | 48    | 0.05 | 962 | Dominated |
| CVD-31                                         | Treatment of CHF with $\beta$ -Blockers                                                                              | 22  | 0.08 | 3,603 | Dominated | 100   | 0.09 | 933 | Dominated |
| CVD-32                                         | Exercise training for persons with CHF                                                                               | 37  | 0.06 | 1,597 | Dominated | 165   | 0.03 | 208 | Dominated |
| CVD-44                                         | Treatment of CHF with diuretics + Exercise training                                                                  | 113 | 0.07 | 580   | Dominated | 462   | 0.05 | 109 | Dominated |
| CVD-45                                         | Treatment of CHF with diuretics + Exercise training + ACEI                                                           | 116 | 0.07 | 627   | Dominated | 474   | 0.07 | 150 | Dominated |
| CVD-36                                         | Treatment of CHF with diuretics + exercise training + $\beta$ -Blocker + ACEI                                        | 123 | 0.10 | 821   | Dominated | 497   | 0.15 | 301 | Dominated |
| CVD-38                                         | Treatment of post-acute IHD and stroke with aspirin + $\beta$ -Blocker + Statin                                      | 553 | 0.13 | 229   | Dominated | 1,011 | 0.18 | 183 | Dominated |
| <b>CVD treatment &amp; prevention packages</b> |                                                                                                                      |     |      |       |           |       |      |     |           |
| CVD-54                                         | Treatment of acute MI (ASA, BB, ACEI, Strep) + post-acute IHD (ASA, BB, Statin)                                      | 252 | 0.17 | 677   | Dominated | 1,047 | 0.36 | 343 | Dominated |
| CVD-55                                         | Treatment of acute MI (ASA, BB, ACEI, Strep) + post-acute IHD (ASA, BB, ACEI, Statin)                                | 334 | 0.19 | 555   | Dominated | 1,347 | 0.40 | 296 | Dominated |
| CVD-56                                         | Treatment of acute MI (ASA, BB, ACEI, Strep) + post-acute IHD & stroke (ASA, BB, Statin)                             | 706 | 0.22 | 317   | Dominated | 1,610 | 0.44 | 273 | Dominated |
| CVD-57                                         | Treatment of post-acute IHD & stroke (ASA, BB, Statin) + CHF (diuretics, exercise)                                   | 702 | 0.14 | 193   | Dominated | 1,544 | 0.21 | 138 | Dominated |
| CVD-58                                         | Treatment of acute MI (ASA, BB, ACEI, Strep) + post-acute IHD & stroke (ASA, BB, Statin) + CHF (diuretics, exercise) | 912 | 0.23 | 256   | Dominated | 2,281 | 0.47 | 205 | Dominated |

|        |                                                                                                                                                             |       |      |     |           |       |      |     |           |
|--------|-------------------------------------------------------------------------------------------------------------------------------------------------------------|-------|------|-----|-----------|-------|------|-----|-----------|
| CVD-59 | Population-based prevention (CVD-12) + treatment of acute MI (ASA, BB, ACEI, Strep) + post-acute IHD (ASA, BB, Statin)                                      | 1,219 | 0.54 | 440 | Dominated | 2,376 | 0.55 | 231 | Dominated |
| CVD-60 | Population-based prevention (CVD-12) + treatment of acute MI (ASA, BB, ACEI, Strep) + post-acute IHD (ASA, BB, ACEI, Statin)                                | 1,295 | 0.54 | 420 | Dominated | 2,661 | 0.59 | 222 | Dominated |
| CVD-61 | Population-based prevention (CVD-12) + treatment of acute MI (ASA, BB, ACEI, Strep) + post-acute IHD & stroke (ASA, BB, Statin)                             | 1,644 | 0.59 | 359 | Dominated | 2,907 | 0.63 | 217 | Dominated |
| CVD-62 | Population-based prevention (CVD-12) + treatment of post-acute IHD & stroke (ASA, BB, Statin) + CHF (diuretics, exercise)                                   | 1,650 | 0.50 | 304 | Dominated | 2,898 | 0.40 | 139 | Dominated |
| CVD-63 | Population-based prevention (CVD-12) + treatment of acute MI (ASA, BB, ACEI, Strep) + Post-acute IHD & stroke (ASA, BB, Statin) + CHF (diuretics, exercise) | 1,835 | 0.60 | 326 | Dominated | 3,544 | 0.66 | 186 | Dominated |
| CVD-64 | Individual-based prevention (CVD-13) + treatment of acute MI (ASA, BB, ACEI, Strep) + post-acute IHD (ASA, BB, Statin)                                      | 4,307 | 1.07 | 249 | Dominated | 5,526 | 2.57 | 465 | Dominated |
| CVD-65 | Individual-based prevention (CVD-13) + treatment of acute MI (ASA, BB, ACEI, Strep) + post-acute IHD (ASA, BB, ACEI, Statin)                                | 4,368 | 1.08 | 247 | Dominated | 5,776 | 2.61 | 452 | Dominated |
| CVD-66 | Individual-based prevention (CVD-13) + treatment of acute MI (ASA, BB, ACEI, Strep) + post-acute IHD & stroke (ASA, BB, Statin)                             | 4,626 | 1.13 | 244 | Dominated | 5,977 | 2.65 | 443 | Dominated |
| CVD-67 | Individual-based prevention (CVD-13) + treatment of post-acute IHD & stroke (ASA, BB, Statin) + CHF (diuretics, exercise)                                   | 4,656 | 1.04 | 223 | Dominated | 6,096 | 2.42 | 397 | Dominated |
| CVD-68 | Individual-based prevention (CVD-13) + treatment of acute MI (ASA, BB, ACEI, Strep) + Post-acute IHD & stroke (ASA, BB, Statin) + CHF (diuretics, exercise) | 4,779 | 1.14 | 238 | Dominated | 6,533 | 2.68 | 410 | Dominated |
| CVD-69 | Combination drug treatment (>25% risk of CVD event) + treatment of acute MI (ASA, BB, ACEI, Strep) + post-acute IHD (ASA, BB, Statin)                       | 4,474 | 0.75 | 167 | Dominated | 4,825 | 1.16 | 240 | Dominated |
| CVD-70 | Combination drug treatment (>25% risk of CVD event) + treatment of acute MI (ASA, BB, ACEI, Strep) + post-acute IHD (ASA, BB, ACEI, Statin)                 | 4,719 | 0.76 | 160 | Dominated | 5,089 | 1.20 | 235 | Dominated |
| CVD-71 | Combination drug treatment (>25% risk of CVD event) + treatment of acute MI (ASA, BB, ACEI, Strep) + post-acute IHD & stroke (ASA, BB, Statin)              | 4,884 | 0.80 | 164 | Dominated | 5,267 | 1.24 | 235 | Dominated |
| CVD-72 | Combination drug treatment (>25% risk of CVD event) + treatment of post-acute IHD &                                                                         | 4,947 | 0.71 | 144 | Dominated | 5,299 | 1.01 | 191 | Dominated |

|                                                    |                                                                                                                                                |       |      |       |           |       |      |       |           |
|----------------------------------------------------|------------------------------------------------------------------------------------------------------------------------------------------------|-------|------|-------|-----------|-------|------|-------|-----------|
|                                                    | stroke (ASA, BB, Statin) + CHF (diuretics, exercise)                                                                                           |       |      |       |           |       |      |       |           |
| CVD-73                                             | Preventive multi-drug therapy (>25% risk) + multi-drug treatment of acute MI / post-acute IHD & stroke + CHF (diuretics, exercise)             | 5,431 | 0.81 | 149   | 1,165     | 5,857 | 1.27 | 216   | 462       |
| CVD-74                                             | Combination drug treatment (>35% risk of CVD event) + treatment of acute MI (ASA, BB, ACEI, Strep) + post-acute IHD (ASA, BB, Statin)          | 4,118 | 0.55 | 135   | Dominated | 3,886 | 0.77 | 198   | Dominated |
| CVD-75                                             | Combination drug treatment (>35% risk of CVD event) + treatment of acute MI (ASA, BB, ACEI, Strep) + post-acute IHD (ASA, BB, ACEI, Statin)    | 4,408 | 0.56 | 128   | Dominated | 4,160 | 0.81 | 195   | Dominated |
| CVD-76                                             | Combination drug treatment (>35% risk of CVD event) + treatment of acute MI (ASA, BB, ACEI, Strep) + post-acute IHD & stroke (ASA, BB, Statin) | 4,616 | 0.61 | 132   | Dominated | 4,355 | 0.85 | 195   | Dominated |
| CVD-77                                             | Preventive multi-drug therapy (>35% risk) + multi-drug treatment of post-acute IHD & stroke + CHF (diuretics, exercise)                        | 4,649 | 0.52 | 112   | 129       | 4,386 | 0.62 | 142   | 152       |
| CVD-78                                             | Preventive multi-drug therapy (>35% risk) + multi-drug treatment of acute MI / post-acute IHD & stroke + CHF (diuretics, exercise)             | 5,265 | 0.62 | 117   | 158       | 5,016 | 0.88 | 175   | 404       |
| <b>Treatment of diabetes and its complications</b> |                                                                                                                                                |       |      |       |           |       |      |       |           |
| DM-2                                               | Standard glycemc control (Standard GC)                                                                                                         | 1,075 | 1.02 | 944   | Dominated | 1,717 | 0.82 | 477   | Dominated |
| DM-3                                               | Intensive glycemc control (Intensive GC)                                                                                                       | 1,320 | 2.14 | 1,624 | Dominated | 2,044 | 1.77 | 867   | Dominated |
| DM-4                                               | Retinopathy screening + photocoagulation (Retinopathy)                                                                                         | 1,228 | 1.00 | 814   | 814       | 1,891 | 0.32 | 170   | 170       |
| DM-5                                               | Neuropathy screening + preventive foot care (Neuropathy)                                                                                       | 327   | 0.67 | 2,055 | Dominated | 721   | 0.42 | 585   | Dominated |
| DM-6                                               | Standard GC + Retinopathy                                                                                                                      | 1,467 | 2.02 | 1,375 | 4,266     | 2,233 | 1.14 | 512   | 2,399     |
| DM-7                                               | Standard GC + Neuropathy                                                                                                                       | 1,079 | 1.69 | 1,563 | Dominated | 1,721 | 1.24 | 721   | Dominated |
| DM-8                                               | Intensive GC + Retinopathy                                                                                                                     | 1,529 | 3.17 | 2,070 | 18,419    | 2,319 | 2.11 | 912   | 11,348    |
| DM-9                                               | Intensive GC + Neuropathy                                                                                                                      | 1,191 | 2.83 | 2,380 | Dominated | 1,865 | 2.21 | 1,186 | Dominated |
| DM-10                                              | Standard GC + Retinopathy + Neuropathy                                                                                                         | 1,353 | 2.69 | 1,987 | Dominated | 2,078 | 1.56 | 753   | Dominated |
| DM-11                                              | Intensive GC + Retinopathy + Neuropathy                                                                                                        | 1,389 | 3.93 | 2,827 | Dominated | 2,122 | 2.62 | 1,234 | Dominated |

- To convert international dollars to local currency units, the international dollar figure should be multiplied by the purchasing power parity (PPP) exchange rate. A list of PPP exchange rates developed by WHO for all members states can be found here: <http://www.who.int/choice/costs/ppp/en/index.html>

## Appendix 7 CVD treatment strategies: cost per treated case

|                                                                       |                                                                     | WHO African sub-region AfrE |                                    | WHO South East Asian SearD |                                    |
|-----------------------------------------------------------------------|---------------------------------------------------------------------|-----------------------------|------------------------------------|----------------------------|------------------------------------|
|                                                                       |                                                                     | Treated cases               | Annual cost per treated case (I\$) | Treated cases              | Annual cost per treated case (I\$) |
| <b>CVD prevention: control of high blood pressure and cholesterol</b> |                                                                     |                             |                                    |                            |                                    |
| CVD-4                                                                 | Individual drug treatment for hypertension (SBP > 140) + education  | 18,006,451                  | 40                                 | 78,537,678                 | 35                                 |
| CVD-5                                                                 | Individual drug treatment for hypertension (SBP > 160) + education  | 3,427,049                   | 55                                 | 10,553,021                 | 45                                 |
| CVD-6                                                                 | Individual cholesterol treatment (> 5.7 mmol/l)                     | 12,954,156                  | 42                                 | 134,573,306                | 33                                 |
| CVD-7                                                                 | Individual cholesterol treatment (> 6.2 mmol/l)                     | 6,983,432                   | 45                                 | 82,841,197                 | 31                                 |
| CVD-8                                                                 | Preventive multi-drug treatment (>5% risk of CVD event)             | 17,782,033                  | 53                                 | 93,323,598                 | 57                                 |
| CVD-9                                                                 | Combination drug treatment (>15% risk of CVD event)                 | 6,698,900                   | 57                                 | 36,124,877                 | 64                                 |
| CVD-10                                                                | Combination drug treatment (>25% risk of CVD event)                 | 3,183,358                   | 65                                 | 17,076,770                 | 65                                 |
| CVD-11                                                                | Preventive multi-drug treatment (>35% risk of CVD event)            | 1,647,781                   | 80                                 | 8,684,418                  | 66                                 |
| <b>CVD treatment: Acute care of IHD / stroke</b>                      |                                                                     |                             |                                    |                            |                                    |
| CVD-14                                                                | Treatment of acute MI in hospital with aspirin                      | 64,310                      | 667                                | 636,937                    | 368                                |
| CVD-16                                                                | Treatment of acute MI in hospital with ACE inhibitors               | 64,310                      | 785                                | 636,937                    | 430                                |
| CVD-18                                                                | Treatment of acute MI in hospital with $\beta$ -Blockers            | 64,310                      | 783                                | 636,937                    | 427                                |
| CVD-21                                                                | Treatment of acute MI in hospital with thrombolysis (streptokinase) | 64,310                      | 950                                | 636,937                    | 591                                |
| CVD-22                                                                | Treatment of acute MI in hospital with primary PTCA (angioplasty)   | 64,310                      | 1,701                              | 636,937                    | 1,217                              |
| CVD-40                                                                | Treatment of acute MI with aspirin + PTCA                           | 64,310                      | 1,705                              | 636,937                    | 1,221                              |

|        |                                                                                                                           |         |       |           |       |
|--------|---------------------------------------------------------------------------------------------------------------------------|---------|-------|-----------|-------|
| CVD-41 | Treatment of acute MI with aspirin + streptokinase                                                                        | 64,310  | 950   | 636,937   | 592   |
| CVD-47 | Treatment of acute MI with aspirin + ACEI + streptokinase                                                                 | 64,310  | 961   | 636,937   | 602   |
| CVD-49 | Treatment of acute MI with aspirin, ACEI + PTCA                                                                           | 64,310  | 1,708 | 636,937   | 1,225 |
| CVD-50 | Treatment of acute MI with aspirin, B-blocker + ACEI                                                                      | 64,310  | 795   | 636,937   | 439   |
| CVD-33 | Treatment of acute MI with aspirin + $\beta$ -Blocker + ACEi + Streptokinase                                              | 64,310  | 962   | 636,937   | 603   |
| CVD-39 | Treatment of acute MI with ASA + $\beta$ -Blocker + ACEI + PTCA                                                           | 64,310  | 1,709 | 636,937   | 1,226 |
| CVD-49 | Treatment of acute MI with aspirin, ACEI + PTCA                                                                           | 64,310  | 1,708 | 636,937   | 1,225 |
| CVD-50 | Treatment of acute MI with aspirin, B-blocker + ACEI                                                                      | 64,310  | 795   | 636,937   | 439   |
| CVD-28 | Organised stroke unit care                                                                                                | 167,911 | 1,904 | 764,470   | 1,539 |
| CVD-24 | Treatment of acute ischemic stroke in hospital with aspirin<br><b>CVD treatment: Secondary prevention of IHD / stroke</b> | 167,911 | 1,529 | 764,470   | 1,222 |
| CVD-15 | Treatment of post-acute IHD with aspirin                                                                                  | 293,545 | 87    | 293,545   | 260   |
| CVD-17 | Treatment of post-acute IHD with ACE inhibitors                                                                           | 293,545 | 109   | 4,397,400 | 45    |
| CVD-19 | Treatment of post-acute IHD with $\beta$ -Blockers                                                                        | 293,545 | 92    | 4,397,400 | 24    |
| CVD-20 | Treatment of post-acute IHD with statins                                                                                  | 293,545 | 91    | 4,397,400 | 23    |
| CVD-43 | Treatment of post-acute IHD with aspirin + $\beta$ -Blocker                                                               | 293,545 | 94    | 4,397,400 | 26    |
| CVD-42 | Treatment of post-acute IHD with aspirin + $\beta$ -Blocker + Statin                                                      | 293,545 | 100   | 4,397,400 | 33    |
| CVD-34 | Treatment of post-acute IHD with aspirin + $\beta$ -Blocker + statin + ACEI                                               | 293,545 | 132   | 4,397,400 | 69    |
| CVD-51 | Treatment of post-acute IHD with aspirin, B-Blocker + ACEI                                                                | 293,545 | 105   | 4,397,400 | 38    |



|        |                                                                                 |         |     |           |     |
|--------|---------------------------------------------------------------------------------|---------|-----|-----------|-----|
| CVD-52 | Treatment of post-acute IHD with aspirin, B-Blocker + Cardiac rehab             | 293,545 | 105 | 4,397,400 | 32  |
| CVD-53 | Treatment of post-acute IHD with aspirin, B-Blocker, ACEi + Statin              | 293,545 | 113 | 4,397,400 | 46  |
| CVD-23 | Cardiac rehabilitation for post-acute IHD                                       | 293,545 | 83  | 4,397,400 | 12  |
| CVD-25 | Treatment of post-acute stroke with aspirin                                     | 543,965 | 67  | 2,495,549 | 40  |
| CVD-26 | Treatment of post-acute stroke with statins                                     | 543,965 | 80  | 2,495,549 | 56  |
| CVD-46 | Treatment of post-acute stroke with aspirin + statin                            | 543,965 | 84  | 2,495,549 | 60  |
| CVD-27 | Treatment of post-acute stroke with ACE-Inhibitor + diuretic                    | 543,965 | 117 | 2,495,549 | 102 |
| CVD-35 | Treatment of post-acute stroke with aspirin + statin + ACEi + diuretic          | 543,965 | 137 | 2,495,549 | 121 |
| CVD-37 | Treatment of post-acute IHD and stroke with statins                             | 258,786 | 185 | 3,853,846 | 54  |
| CVD-48 | Treatment of ischemic stroke and MI with aspirin                                | 258,786 | 151 | 3,853,846 | 37  |
| CVD-38 | Treatment of post-acute IHD and stroke with aspirin + $\beta$ -Blocker + Statin | 258,786 | 197 | 3,853,846 | 67  |
| CVD-29 | Treatment of CHF with diuretics                                                 | 100,368 | 241 | 860,317   | 52  |
| CVD-30 | Treatment of CHF with ACE inhibitors                                            | 100,368 | 258 | 860,317   | 75  |
| CVD-31 | Treatment of CHF with $\beta$ -Blockers                                         | 100,368 | 318 | 860,317   | 150 |
| CVD-32 | Exercise training for persons with CHF                                          | 100,368 | 237 | 860,317   | 55  |
| CVD-44 | Treatment of CHF with diuretics + Exercise training                             | 100,368 | 262 | 860,317   | 81  |
| CVD-45 | Treatment of CHF with diuretics + Exercise training + ACEi                      | 100,368 | 292 | 860,317   | 115 |
| CVD-36 | Treatment of CHF with diuretics + exercise training + $\beta$ -Blocker + ACEi   | 100,368 | 404 | 860,317   | 241 |
